# Supplementary material for: Facile growth of a Sb2Se3 nanorod array induced by a MoSe2 interlayer and its application in 3D p–n junction solar cells
Source: Royal Society of Chemistry journal article supplement (doi:10.1039/d1ma00804h), 2021-12-21
Supplement: d1ma00804h1.pdf [file d1ma00804h1.pdf]

## Supporting Information

for

### Facile growth of a $\text{Sb}_2\text{Se}_3$ nanorods array induced by a $\text{MoSe}_2$ interlayer and its application to 3D p-n junction solar cells

Si-Nae Park<sup>a,†</sup>, Se-Yun Kim<sup>c,†</sup>, Sang-Ju Lee<sup>a,b</sup>, Shi-Joon Sung<sup>a,b,\*</sup>, Kee-Jeong Yang<sup>a,b</sup>, Jin-Kyu Kang<sup>a,b</sup>, Dae-Hwan Kim<sup>a,b,\*</sup>

<sup>a</sup> *Research Center for Thin Film Solar Cells, Daegu-Gyeongbuk Institute of Science and Technology (DGIST), Daegu 42988, Republic of Korea*

<sup>b</sup> *Division of Energy Technology, Daegu-Gyeongbuk Institute of Science and Technology (DGIST), Daegu 42988, Republic of Korea*

<sup>c</sup> *Department of Materials Science and Engineering, Kyungnam University, Gyeongsangnam-do 51767, Republic of Korea*

*\*Corresponding author e-mails: sjsung@dgist.ac.kr (S.-J. Sung), monolith@dgist.ac.kr (D.-H. Kim)*

*†These authors contributed equally to the preparation of this paper.*

#### Table of Contents

**Figure S1.** Top and cross-sectional SEM images of co-evaporated  $\text{Sb}_2\text{Se}_3$  thin films on ITO substrates with different source evaporation rate; (a) 50, (b) 100, (c) 200, and (d) 400 Å/s.

**Figure S2.** Top and cross-sectional SEM images of co-evaporated  $\text{Sb}_2\text{Se}_3$  thin films on ITO substrates with different substrate temperature; (a) 250, (b) 260, (c) 270, and (d) 290 °C.

**Figure S3.** HADDF-STEM image of the  $\text{Sb}_2\text{Se}_3/\text{MoSe}_2/\text{Mo}$  interface.

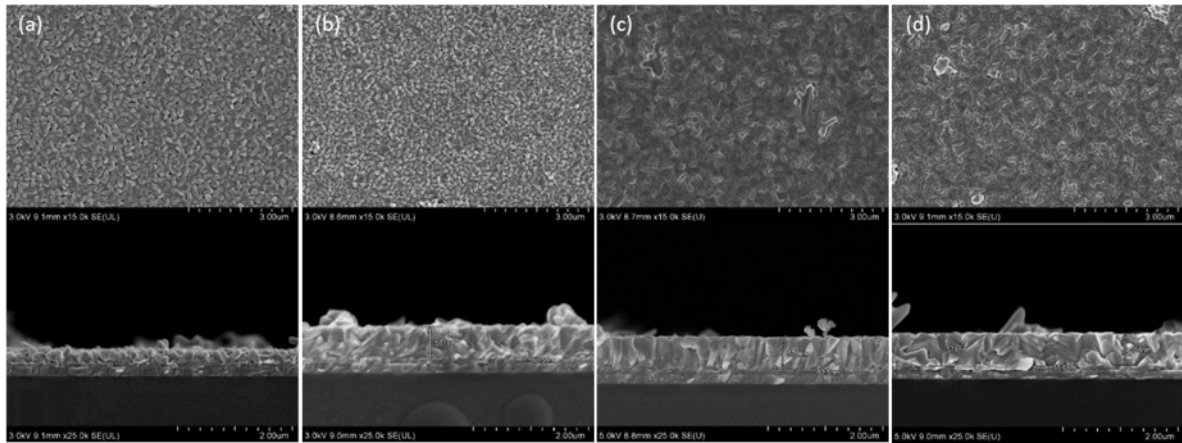

**Figure S1.** Top and cross-sectional SEM images of co-evaporated  $\text{Sb}_2\text{Se}_3$  thin films on ITO substrates with different source evaporation rate; (a) 50, (b) 100, (c) 200, and (d) 400  $\text{\AA}/\text{s}$ .

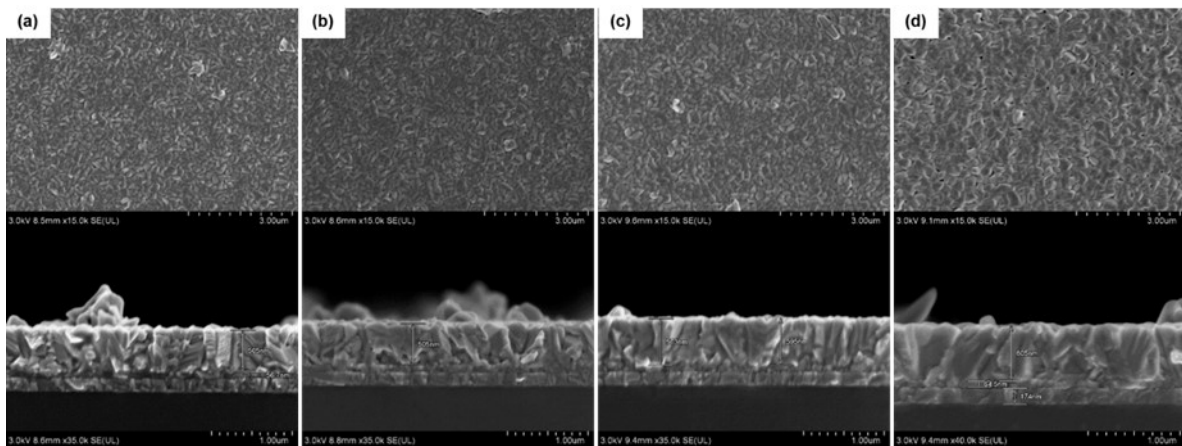

**Figure S2.** Top and cross-sectional SEM images of co-evaporated  $\text{Sb}_2\text{Se}_3$  thin films on ITO substrates with different substrate temperature; (a) 250, (b) 260, (c) 270, and (d) 290  $^{\circ}\text{C}$ .

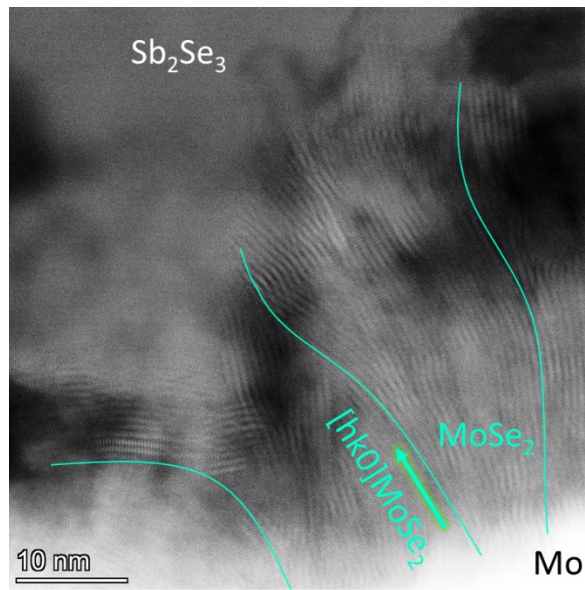

**Figure S3:** HADF-STEM image of the  $\text{Sb}_2\text{Se}_3/\text{MoSe}_2/\text{Mo}$  interface.
